# Supplementary material for: Genetic ancestry and diagnostic yield of exome sequencing in a diverse population
Source: PubMed Central journal article supplement (PMC10764913; doi:10.1038/s41525-023-00385-6), 2024-01-03
Supplement: 41525_2023_385_MOESM2_ESM.pdf [file 41525_2023_385_MOESM2_ESM.pdf]

**Supplementary Table 1. Results of logistic regression analysis of diagnostic yield by genetic ancestry.** Regression coefficient for prenatal/pediatric indicator has pediatric as reference. Beta is the regression coefficient for genetic ancestry, coded in 1% increments. P-value is for test of statistical significance of Beta. Ratio refers to ratio of projected probability of positive case outcome for 100% vs 0% of the listed ancestry based on regression model; Ratio-Lower is based on the lower 95% confidence limit for Beta and Ratio-Upper is based on the upper 95% confidence limit for Beta.

| <b>Genetic Ancestry</b> | <b>Intercept</b> | <b>Prenatal/<br/>Pediatric</b> | <b>Beta</b> | <b>SE<br/>(Beta)</b> | <b>P-value</b> | <b>Ratio-<br/>Lower</b> | <b>Ratio-<br/>Upper</b> |
|-------------------------|------------------|--------------------------------|-------------|----------------------|----------------|-------------------------|-------------------------|
| African                 | -0.967           | -.201                          | -.00667     | .00552               | .227           | .224                    | 1.330                   |
| Native American         | -0.977           | -.201                          | -.00121     | .00306               | .692           | .564                    | 1.386                   |
| East Asian              | -1.007           | -.187                          | -.00080     | .00330               | .809           | .561                    | 1.463                   |
| European                | -1.130           | -.208                          | .00280      | .00247               | .258           | .858                    | 1.640                   |
| Middle Eastern          | -0.970           | -.194                          | -.00505     | .00609               | .407           | .234                    | 1.572                   |
| South Asian             | -1.026           | -.194                          | .00216      | .00368               | .556           | .676                    | 1.801                   |

**Supplementary Table 2: Number of pediatric cases by genetic ancestry bins, stratified by extended inheritance pattern.**

| Ancestry                                    | Case definition | Inheritance Pattern                         | N                          | Number of pediatric cases & (%) in each bin |            |            |            |           | C-A test Z-statistic |
|---------------------------------------------|-----------------|---------------------------------------------|----------------------------|---------------------------------------------|------------|------------|------------|-----------|----------------------|
|                                             |                 |                                             |                            | 0-12.5%                                     | 12.5-37.5% | 37.5-62.5% | 62.5-87.5% | 87.5-100% |                      |
| African                                     | Positive        | Autosomal dominant de novo                  | 68                         | 62                                          | 2          | 1          | 2          | 1         | -0.25                |
|                                             |                 | Autosomal dominant inherited                | 14                         | 12                                          | 1          | 0          | 1          | 0         | 0.25                 |
|                                             |                 | Autosomal dominant unknown                  | 17                         | 13                                          | 2          | 1          | 1          | 0         | 0.93                 |
|                                             |                 | Autosomal recessive (compound heterozygous) | 11                         | 9                                           | 1          | 1          | 0          | 0         | 0.17                 |
|                                             |                 | Autosomal recessive (homozygous)            | 14                         | 13                                          | 1          | 0          | 0          | 0         | -0.77                |
|                                             |                 | X-linked                                    | 17                         | 17                                          | 0          | 0          | 0          | 0         | -1.23                |
|                                             | Inconclusive    | Autosomal dominant de novo                  | 12                         | 11                                          | 1          | 0          | 0          | 0         | -0.66                |
|                                             |                 | Autosomal dominant inherited                | 11                         | 8                                           | 2          | 1          | 0          | 0         | 0.56                 |
|                                             |                 | Autosomal dominant unknown                  | 7                          | 6                                           | 0          | 1          | 0          | 0         | 0.18                 |
|                                             |                 | Autosomal recessive (compound heterozygous) | 8                          | 7                                           | 0          | 0          | 0          | 1         | 0.94                 |
|                                             |                 | Autosomal recessive (homozygous)            | 24                         | 23                                          | 0          | 0          | 1          | 0         | -0.66                |
|                                             |                 | X-linked                                    | 11                         | 10                                          | 0          | 1          | 0          | 0         | -0.21                |
|                                             | Negative        | Negative                                    | 315                        | 284                                         | 10         | 4          | 13         | 4         |                      |
|                                             | Native American | Positive                                    | Autosomal dominant de novo | 68                                          | 28         | 9          | 21         | 6         | 4                    |
| Autosomal dominant inherited                |                 |                                             | 14                         | 8                                           | 2          | 3          | 1          | 0         | -1.25                |
| Autosomal dominant unknown                  |                 |                                             | 17                         | 6                                           | 4          | 5          | 1          | 1         | 0.09                 |
| Autosomal recessive (compound heterozygous) |                 |                                             | 11                         | 6                                           | 2          | 3          | 0          | 0         | -1.27                |
| Autosomal recessive (homozygous)            |                 |                                             | 14                         | 9                                           | 0          | 4          | 0          | 1         | -1.03                |
| X-linked                                    |                 |                                             | 17                         | 7                                           | 1          | 8          | 1          | 0         | -0.10                |
| Inconclusive                                |                 | Autosomal dominant de novo                  | 12                         | 7                                           | 1          | 2          | 2          | 0         | -0.80                |
|                                             |                 | Autosomal dominant inherited                | 11                         | 5                                           | 1          | 3          | 2          | 0         | -0.06                |
|                                             |                 | Autosomal dominant unknown                  | 7                          | 4                                           | 2          | 1          | 0          | 0         | -1.35                |
|                                             |                 | Autosomal recessive (compound heterozygous) | 8                          | 4                                           | 1          | 3          | 0          | 0         | -0.75                |
|                                             |                 | Autosomal recessive (homozygous)            | 24                         | 12                                          | 1          | 7          | 2          | 2         | 0.01                 |

|                       |              |                                             |     |     |     |    |    |    |       |
|-----------------------|--------------|---------------------------------------------|-----|-----|-----|----|----|----|-------|
|                       |              | X-linked                                    | 11  | 5   | 0   | 5  | 1  | 0  | -0.06 |
|                       | Negative     | Negative                                    | 315 | 136 | 43  | 85 | 37 | 14 |       |
| <b>East Asian</b>     | Positive     | Autosomal dominant de novo                  | 68  | 61  | 2   | 5  | 0  | 0  | -0.96 |
|                       |              | Autosomal dominant inherited                | 14  | 14  | 0   | 0  | 0  | 0  | -1.14 |
|                       |              | Autosomal dominant unknown                  | 17  | 14  | 1   | 1  | 0  | 1  | 0.50  |
|                       |              | Autosomal recessive (compound heterozygous) | 11  | 9   | 1   | 0  | 0  | 1  | 0.55  |
|                       |              | Autosomal recessive (homozygous)            | 14  | 13  | 0   | 0  | 0  | 1  | -0.02 |
|                       |              | X-linked                                    | 17  | 14  | 1   | 0  | 0  | 2  | 0.97  |
|                       | Inconclusive | Autosomal dominant de novo                  | 12  | 12  | 0   | 0  | 0  | 0  | -1.05 |
|                       |              | Autosomal dominant inherited                | 11  | 9   | 0   | 1  | 0  | 1  | 0.85  |
|                       |              | Autosomal dominant unknown                  | 7   | 7   | 0   | 0  | 0  | 0  | -0.81 |
|                       |              | Autosomal recessive (compound heterozygous) | 8   | 7   | 0   | 0  | 0  | 1  | 0.60  |
|                       |              | Autosomal recessive (homozygous)            | 24  | 23  | 0   | 0  | 0  | 1  | -0.62 |
|                       |              | X-linked                                    | 11  | 11  | 0   | 0  | 0  | 0  | -1.01 |
|                       | Negative     | Negative                                    | 315 | 283 | 8   | 4  | 4  | 16 |       |
| <b>European</b>       | Positive     | Autosomal dominant de novo                  | 68  | 9   | 28  | 15 | 5  | 11 | 0.24  |
|                       |              | Autosomal dominant inherited                | 14  | 0   | 5   | 3  | 2  | 4  | 1.88  |
|                       |              | Autosomal dominant unknown                  | 17  | 2   | 6   | 6  | 1  | 2  | 0.08  |
|                       |              | Autosomal recessive (compound heterozygous) | 11  | 1   | 4   | 2  | 0  | 4  | 1.24  |
|                       |              | Autosomal recessive (homozygous)            | 14  | 6   | 6   | 1  | 0  | 1  | -2.28 |
|                       |              | X-linked                                    | 17  | 2   | 9   | 0  | 2  | 4  | 0.44  |
|                       | Inconclusive | Autosomal dominant de novo                  | 12  | 2   | 4   | 1  | 3  | 2  | 0.61  |
|                       |              | Autosomal dominant inherited                | 11  | 3   | 4   | 2  | 1  | 1  | -0.78 |
|                       |              | Autosomal dominant unknown                  | 7   | 0   | 1   | 3  | 1  | 2  | 1.77  |
|                       |              | Autosomal recessive (compound heterozygous) | 8   | 2   | 3   | 1  | 1  | 1  | -0.38 |
|                       |              | Autosomal recessive (homozygous)            | 24  | 10  | 12  | 0  | 1  | 1  | -3.19 |
|                       |              | X-linked                                    | 11  | 2   | 3   | 2  | 1  | 3  | 0.79  |
|                       | Negative     | Negative                                    | 315 | 58  | 115 | 63 | 28 | 51 |       |
| <b>Middle Eastern</b> | Positive     | Autosomal dominant de novo                  | 68  | 52  | 16  | 0  | 0  | 0  | -0.28 |
|                       |              | Autosomal dominant inherited                | 14  | 11  | 3   | 0  | 0  | 0  | -0.28 |

|                    |              |                                             |     |     |   |   |   |   |       |
|--------------------|--------------|---------------------------------------------|-----|-----|---|---|---|---|-------|
|                    |              | Autosomal dominant unknown                  | 17  | 14  | 3 | 0 | 0 | 0 | -0.60 |
|                    |              | Autosomal recessive (compound heterozygous) | 11  | 8   | 3 | 0 | 0 | 0 | 0.12  |
|                    |              | Autosomal recessive (homozygous)            | 14  | 11  | 2 | 0 | 0 | 1 | 1.15  |
|                    |              | X-linked                                    | 17  | 12  | 5 | 0 | 0 | 0 | 0.31  |
|                    | Inconclusive | Autosomal dominant de novo                  | 12  | 7   | 3 | 0 | 0 | 2 | 3.79  |
|                    |              | Autosomal dominant inherited                | 11  | 9   | 1 | 0 | 1 | 0 | 0.66  |
|                    |              | Autosomal dominant unknown                  | 7   | 5   | 1 | 1 | 0 | 0 | 0.87  |
|                    |              | Autosomal recessive (compound heterozygous) | 8   | 5   | 3 | 0 | 0 | 0 | 0.65  |
|                    |              | Autosomal recessive (homozygous)            | 24  | 15  | 5 | 0 | 0 | 4 | 4.49  |
|                    |              | X-linked                                    | 11  | 8   | 2 | 0 | 0 | 1 | 1.70  |
| Negative           | Negative     | 315                                         | 243 | 68  | 1 | 2 | 1 |   |       |
| <b>South Asian</b> | Positive     | Autosomal dominant de novo                  | 68  | 61  | 1 | 0 | 3 | 3 | 1.29  |
|                    |              | Autosomal dominant inherited                | 14  | 14  | 0 | 0 | 0 | 0 | -0.91 |
|                    |              | Autosomal dominant unknown                  | 17  | 17  | 0 | 0 | 0 | 0 | -1.00 |
|                    |              | Autosomal recessive (compound heterozygous) | 11  | 11  | 0 | 0 | 0 | 0 | -0.81 |
|                    |              | Autosomal recessive (homozygous)            | 14  | 9   | 0 | 2 | 1 | 2 | 3.95  |
|                    |              | X-linked                                    | 17  | 17  | 0 | 0 | 0 | 0 | -1.00 |
|                    | Inconclusive | Autosomal dominant de novo                  | 12  | 12  | 0 | 0 | 0 | 0 | -0.84 |
|                    |              | Autosomal dominant inherited                | 11  | 11  | 0 | 0 | 0 | 0 | -0.81 |
|                    |              | Autosomal dominant unknown                  | 7   | 7   | 0 | 0 | 0 | 0 | -0.65 |
|                    |              | Autosomal recessive (compound heterozygous) | 8   | 8   | 0 | 0 | 0 | 0 | -0.69 |
|                    |              | Autosomal recessive (homozygous)            | 24  | 19  | 0 | 0 | 3 | 2 | 2.99  |
|                    |              | X-linked                                    | 11  | 11  | 0 | 0 | 0 | 0 | -0.81 |
|                    | Negative     | Negative                                    | 315 | 296 | 1 | 3 | 9 | 6 |       |

**Supplementary Table 3: Number of prenatal cases by genetic ancestry bins, stratified by extended inheritance pattern.**

| Ancestry        | Case definition | Inheritance Pattern                         | N   | Number of prenatal cases & (%) in each bin |            |            |            |           | C-A test Z-statistic |
|-----------------|-----------------|---------------------------------------------|-----|--------------------------------------------|------------|------------|------------|-----------|----------------------|
|                 |                 |                                             |     | 0-12.5%                                    | 12.5-37.5% | 37.5-62.5% | 62.5-87.5% | 87.5-100% |                      |
| African         | Positive        | Autosomal dominant de novo                  | 34  | 33                                         | 1          | 0          | 0          | 0         | -1.33                |
|                 |                 | Autosomal dominant inherited                | 4   | 4                                          | 0          | 0          | 0          | -0.55     |                      |
|                 |                 | Autosomal dominant unknown                  | 1   | 1                                          | 0          | 0          | 0          | -0.27     |                      |
|                 |                 | Autosomal recessive (compound heterozygous) | 11  | 11                                         | 0          | 0          | 0          | -0.90     |                      |
|                 |                 | Autosomal recessive (homozygous)            | 4   | 4                                          | 0          | 0          | 0          | -0.55     |                      |
|                 |                 | X-linked                                    | 6   | 6                                          | 0          | 0          | 0          | -0.67     |                      |
|                 | Inconclusive    | Autosomal dominant de novo                  | 6   | 3                                          | 3          | 0          | 0          | 0         | 1.12                 |
|                 |                 | Autosomal dominant inherited                | 4   | 3                                          | 1          | 0          | 0          | 0         | 0.19                 |
|                 |                 | Autosomal dominant unknown                  | 1   | 1                                          | 0          | 0          | 0          | 0         | -0.27                |
|                 |                 | Autosomal recessive (compound heterozygous) | 3   | 3                                          | 0          | 0          | 0          | 0         | 0.19                 |
|                 |                 | Autosomal recessive (homozygous)            | 3   | 3                                          | 0          | 0          | 0          | 0         | 0.19                 |
|                 |                 | X-linked                                    | 2   | 2                                          | 0          | 0          | 0          | 0         | -0.39                |
|                 | Negative        | Negative                                    | 237 | 216                                        | 9          | 4          | 5          | 3         |                      |
| Native American | Positive        | Autosomal dominant de novo                  | 34  | 24                                         | 5          | 5          | 0          | 0         | 0.22                 |
|                 |                 | Autosomal dominant inherited                | 4   | 2                                          | 1          | 0          | 1          | 0         | 1.43                 |
|                 |                 | Autosomal dominant unknown                  | 1   | 1                                          | 0          | 0          | 0          | 0         | -0.51                |
|                 |                 | Autosomal recessive (compound heterozygous) | 11  | 10                                         | 1          | 0          | 0          | 0         | -1.30                |
|                 |                 | Autosomal recessive (homozygous)            | 4   | 2                                          | 0          | 2          | 0          | 0         | 1.43                 |
|                 |                 | X-linked                                    | 6   | 5                                          | 0          | 0          | 1          | 0         | 0.27                 |
|                 | Inconclusive    | Autosomal dominant de novo                  | 6   | 5                                          | 0          | 1          | 0          | 0         | -0.23                |
|                 |                 | Autosomal dominant inherited                | 4   | 3                                          | 1          | 0          | 0          | 0         | -0.39                |
|                 |                 | Autosomal dominant unknown                  | 1   | 0                                          | 0          | 1          | 0          | 0         | 1.95                 |
|                 |                 | Autosomal recessive (compound heterozygous) | 3   | 3                                          | 0          | 0          | 0          | 0         | -0.87                |
|                 |                 | Autosomal recessive (homozygous)            | 3   | 2                                          | 0          | 0          | 1          | 0         | 1.24                 |
|                 |                 | X-linked                                    | 2   | 2                                          | 0          | 0          | 0          | 0         | -0.71                |

|                                             |                              |                                             |                            |     |    |    |    |    |       |
|---------------------------------------------|------------------------------|---------------------------------------------|----------------------------|-----|----|----|----|----|-------|
|                                             | Negative                     | Negative                                    | 237                        | 179 | 28 | 22 | 7  | 1  |       |
| <b>East Asian</b>                           | Positive                     | Autosomal dominant de novo                  | 34                         | 27  | 1  | 3  | 0  | 3  | 0.45  |
|                                             |                              | Autosomal dominant inherited                | 4                          | 4   | 0  | 0  | 0  | 0  | -0.78 |
|                                             |                              | Autosomal dominant unknown                  | 1                          | 1   | 0  | 0  | 0  | 0  | -0.39 |
|                                             |                              | Autosomal recessive (compound heterozygous) | 11                         | 9   | 0  | 0  | 0  | 2  | 0.72  |
|                                             |                              | Autosomal recessive (homozygous)            | 4                          | 4   | 0  | 0  | 0  | 0  | -0.78 |
|                                             |                              | X-linked                                    | 6                          | 5   | 0  | 1  | 0  | 0  | -0.26 |
|                                             | Inconclusive                 | Autosomal dominant de novo                  | 6                          | 2   | 1  | 1  | 1  | 1  | 2.42  |
|                                             |                              | Autosomal dominant inherited                | 4                          | 4   | 0  | 0  | 0  | 0  | -0.78 |
|                                             |                              | Autosomal dominant unknown                  | 1                          | 1   | 0  | 0  | 0  | 0  | -0.39 |
|                                             |                              | Autosomal recessive (compound heterozygous) | 3                          | 2   | 0  | 1  | 0  | 0  | 0.30  |
|                                             |                              | Autosomal recessive (homozygous)            | 3                          | 3   | 0  | 0  | 0  | 0  | -0.67 |
|                                             |                              | X-linked                                    | 2                          | 0   | 0  | 0  | 0  | 2  | 4.09  |
|                                             | Negative                     | Negative                                    | 237                        | 202 | 3  | 10 | 2  | 20 |       |
|                                             | <b>European</b>              | Positive                                    | Autosomal dominant de novo | 34  | 6  | 4  | 6  | 7  | 11    |
| Autosomal dominant inherited                |                              |                                             | 4                          | 0   | 1  | 0  | 1  | 2  | 0.95  |
| Autosomal dominant unknown                  |                              |                                             | 1                          | 0   | 0  | 0  | 0  | 1  | 1.16  |
| Autosomal recessive (compound heterozygous) |                              |                                             | 11                         | 3   | 0  | 0  | 3  | 5  | 0.75  |
| Autosomal recessive (homozygous)            |                              |                                             | 4                          | 2   | 2  | 0  | 0  | 0  | -2.41 |
| X-linked                                    |                              |                                             | 6                          | 1   | 0  | 1  | 1  | 3  | 0.88  |
| Inconclusive                                |                              | Autosomal dominant de novo                  | 6                          | 1   | 3  | 2  | 0  | 0  | -1.86 |
|                                             |                              | Autosomal dominant inherited                | 4                          | 1   | 0  | 0  | 2  | 1  | 0.28  |
|                                             |                              | Autosomal dominant unknown                  | 1                          | 0   | 0  | 1  | 0  | 0  | -0.20 |
|                                             |                              | Autosomal recessive (compound heterozygous) | 3                          | 0   | 1  | 0  | 0  | 2  | 0.82  |
|                                             |                              | Autosomal recessive (homozygous)            | 3                          | 1   | 1  | 1  | 0  | 0  | -1.51 |
|                                             |                              | X-linked                                    | 2                          | 2   | 0  | 0  | 0  | 0  | -2.18 |
| Negative                                    |                              | Negative                                    | 237                        | 41  | 40 | 33 | 54 | 69 |       |
| <b>Middle Eastern</b>                       |                              | Positive                                    | Autosomal dominant de novo | 34  | 25 | 8  | 1  | 0  | 0     |
|                                             | Autosomal dominant inherited |                                             | 4                          | 3   | 1  | 0  | 0  | 0  | -0.07 |

|                    |              |                                             |     |     |    |   |   |    |       |
|--------------------|--------------|---------------------------------------------|-----|-----|----|---|---|----|-------|
|                    |              | Autosomal dominant unknown                  | 1   | 1   | 0  | 0 | 0 | 0  | -0.47 |
|                    |              | Autosomal recessive (compound heterozygous) | 11  | 9   | 2  | 0 | 0 | 0  | -0.50 |
|                    |              | Autosomal recessive (homozygous)            | 4   | 2   | 1  | 0 | 0 | 1  | 3.12  |
|                    |              | X-linked                                    | 6   | 5   | 1  | 0 | 0 | 0  | -0.44 |
|                    | Inconclusive | Autosomal dominant de novo                  | 6   | 6   | 0  | 0 | 0 | 0  | -1.14 |
|                    |              | Autosomal dominant inherited                | 4   | 4   | 0  | 0 | 0 | 0  | -0.94 |
|                    |              | Autosomal dominant unknown                  | 1   | 0   | 1  | 0 | 0 | 0  | 1.26  |
|                    |              | Autosomal recessive (compound heterozygous) | 3   | 3   | 0  | 0 | 0 | 0  | -0.81 |
|                    |              | Autosomal recessive (homozygous)            | 3   | 2   | 0  | 0 | 0 | 1  | 2.94  |
|                    |              | X-linked                                    | 2   | 2   | 0  | 0 | 0 | 0  | -0.66 |
|                    | Negative     | Negative                                    | 237 | 183 | 48 | 4 | 0 | 2  |       |
| <b>South Asian</b> | Positive     | Autosomal dominant de novo                  | 34  | 31  | 0  | 2 | 0 | 1  | -0.13 |
|                    |              | Autosomal dominant inherited                | 4   | 4   | 0  | 0 | 0 | 0  | -0.54 |
|                    |              | Autosomal dominant unknown                  | 1   | 1   | 0  | 0 | 0 | 0  | -0.27 |
|                    |              | Autosomal recessive (compound heterozygous) | 11  | 10  | 0  | 0 | 0 | 1  | 0.36  |
|                    |              | Autosomal recessive (homozygous)            | 4   | 3   | 0  | 0 | 0 | 1  | 1.50  |
|                    |              | X-linked                                    | 6   | 6   | 0  | 0 | 0 | 0  | -0.66 |
|                    | Inconclusive | Autosomal dominant de novo                  | 6   | 6   | 0  | 0 | 0 | 0  | -0.66 |
|                    |              | Autosomal dominant inherited                | 4   | 3   | 0  | 0 | 0 | 1  | 1.50  |
|                    |              | Autosomal dominant unknown                  | 1   | 1   | 0  | 0 | 0 | 0  | -0.27 |
|                    |              | Autosomal recessive (compound heterozygous) | 3   | 3   | 0  | 0 | 0 | 0  | -0.47 |
|                    |              | Autosomal recessive (homozygous)            | 3   | 2   | 0  | 1 | 0 | 0  | 0.74  |
|                    |              | X-linked                                    | 2   | 2   | 0  | 0 | 0 | 0  | -0.38 |
|                    | Negative     | Negative                                    | 237 | 220 | 1  | 2 | 0 | 14 |       |

**Supplementary Table 4: Recurrent diagnostic pathogenic mutations found among pediatric and prenatal cases.**

| <b>Gene</b>   | <b>Nucleotide change and amino acid substitution</b> | <b>Inheritance pattern</b>                                                  | <b>Pediatric/<br/>Prenatal</b> | <b>Race/Ethnicity categories reported by parents of case 1</b> | <b>Race/Ethnicity categories reported by parents of case 2</b> |
|---------------|------------------------------------------------------|-----------------------------------------------------------------------------|--------------------------------|----------------------------------------------------------------|----------------------------------------------------------------|
| <i>PTPN11</i> | c.182A>G<br>p.Asp61Gly                               | Autosomal dominant de novo                                                  | Pediatric, prenatal.           | LT                                                             | Missing                                                        |
| <i>CDK13</i>  | c.2525A>G<br>p.Asn842Ser                             | Autosomal dominant de novo                                                  | Both pediatric                 | LT                                                             | EU, LT, NAT                                                    |
| <i>FGFR3</i>  | c.742C>T<br>p.Arg248Cys                              | Autosomal dominant de novo, Autosomal dominant unknown (father unavailable) | Both prenatal                  | EU                                                             | EA, EU, Missing                                                |
| <i>PTPN11</i> | c.854T>C<br>p.Phe285Ser                              | Autosomal dominant de novo                                                  | Both prenatal                  | Missing                                                        | EU                                                             |



a)

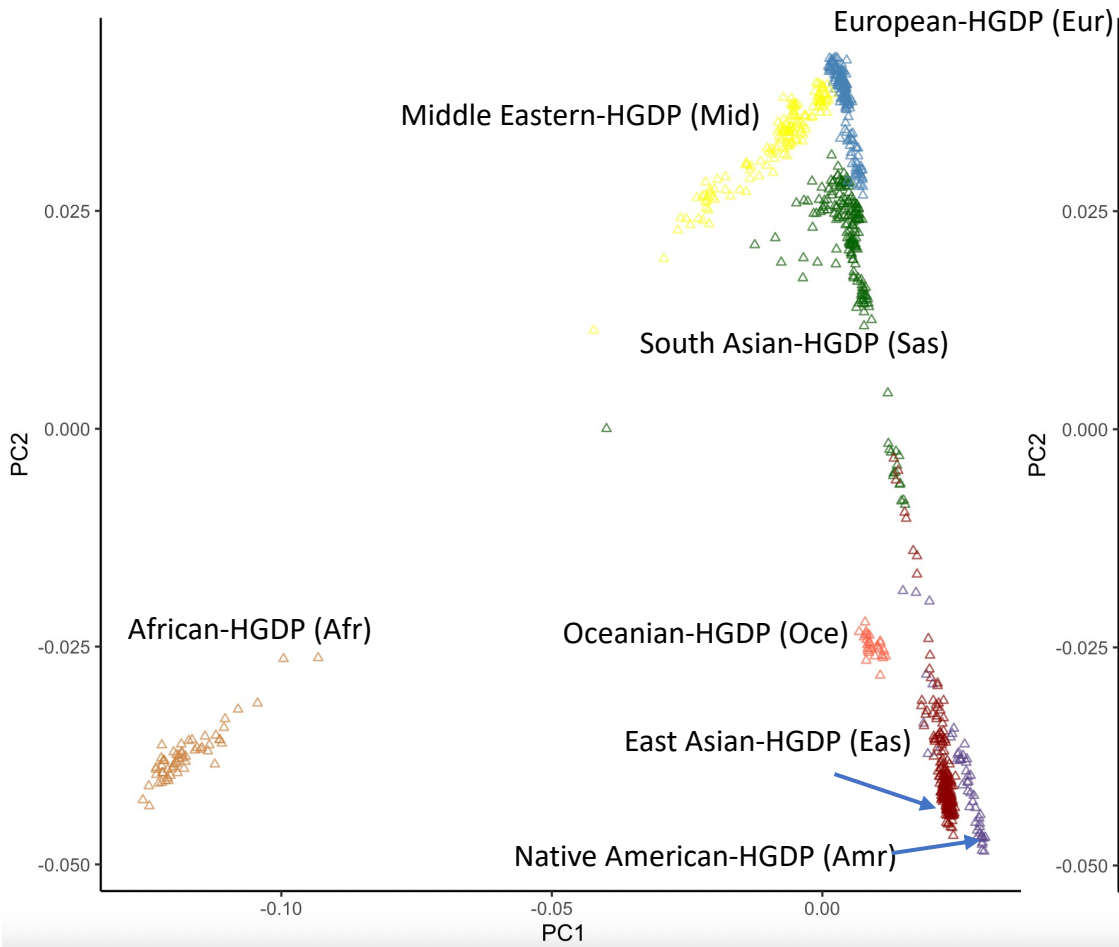

b)

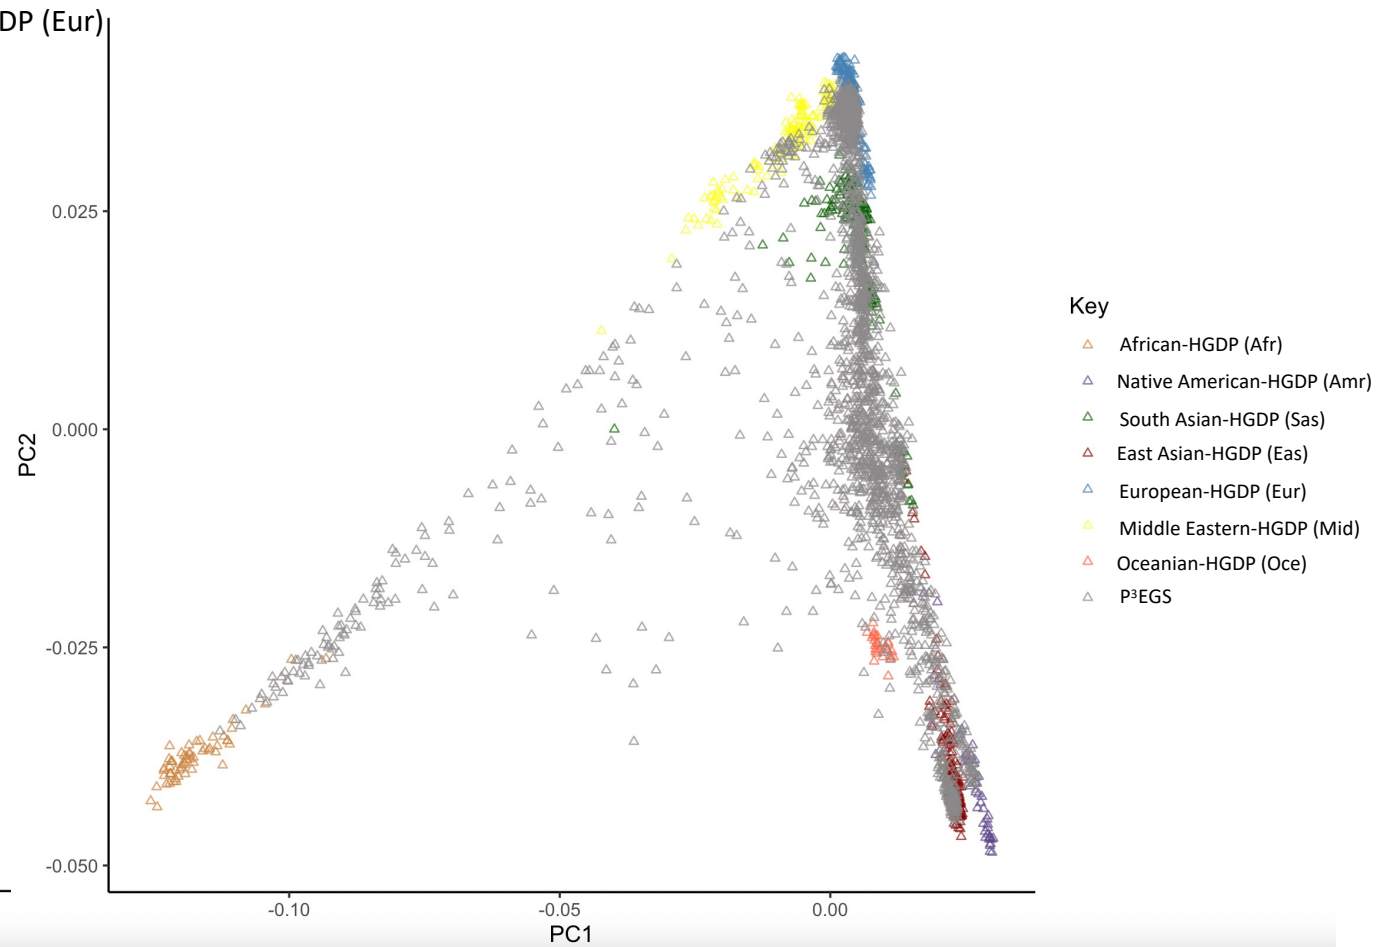

Supplementary Figure 1: PC 1 and PC 2 HGDP samples and P<sup>3</sup>EGS participants projected; a) only HGDP samples; b) HGDP samples and P<sup>3</sup>EGS participants

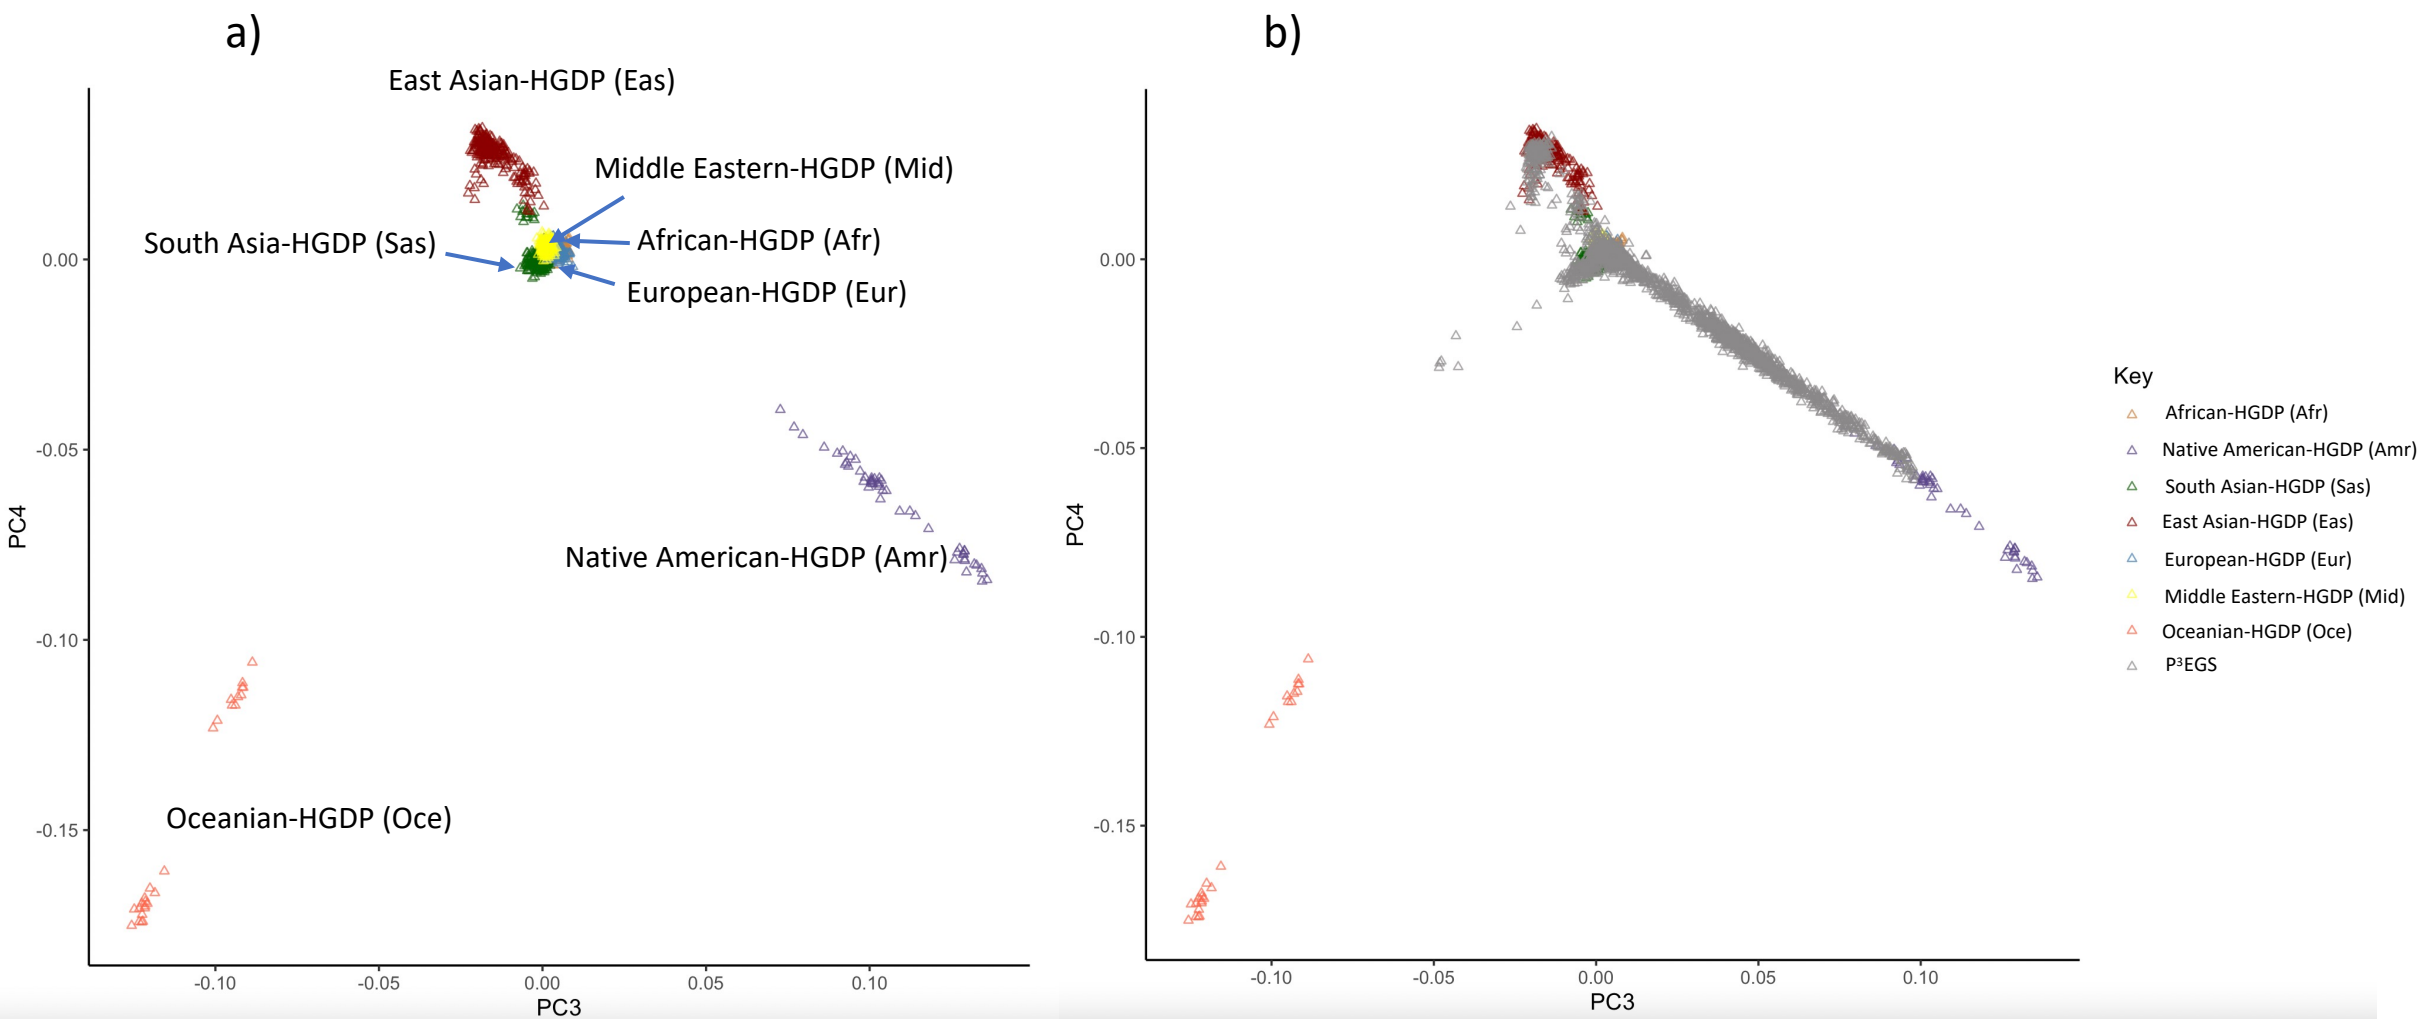

Supplementary Figure 2: PC 3 and PC 4 HGDP samples and P<sup>3</sup>EGS participants projected; a) only HGDP samples; b) HGDP samples and P<sup>3</sup>EGS participants

a)

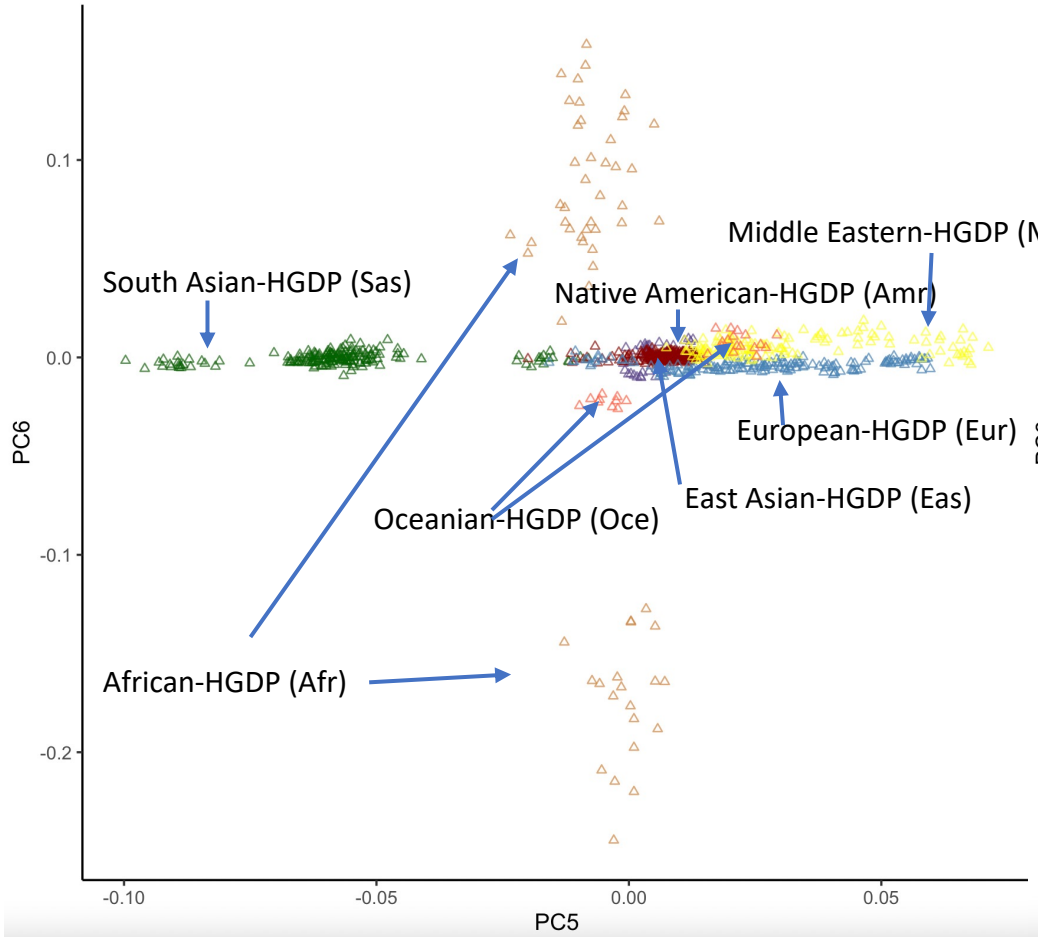

b)

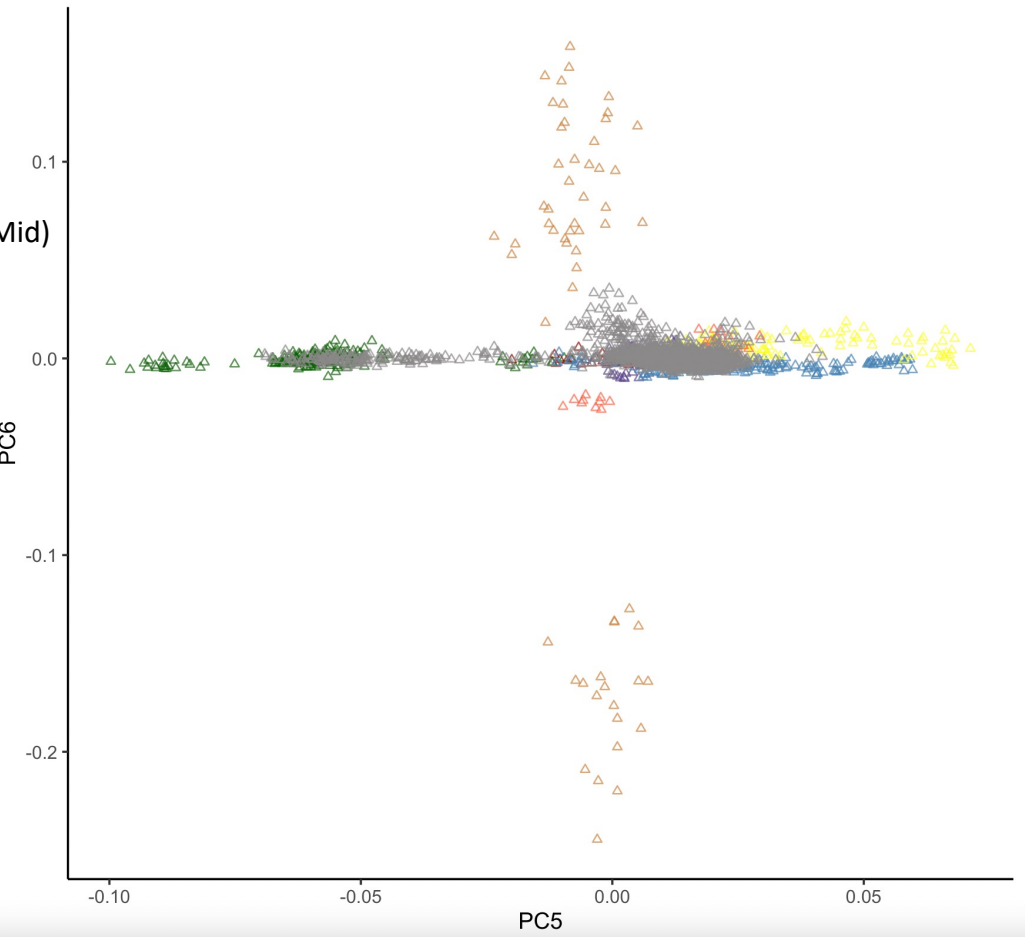

- Key
- △ African-HGDP (Afr)
  - △ Native American-HGDP (Amr)
  - △ South Asian-HGDP (Sas)
  - △ East Asian-HGDP (Eas)
  - △ European-HGDP (Eur)
  - △ Middle Eastern-HGDP (Mid)
  - △ Oceanian-HGDP (Oce)
  - △ P<sup>3</sup>EGS

Supplementary Figure 3: PC 5 and PC 6 HGDP samples and P<sup>3</sup>EGS participants projected; a) only HGDP samples; b) HGDP samples and P<sup>3</sup>EGS participants

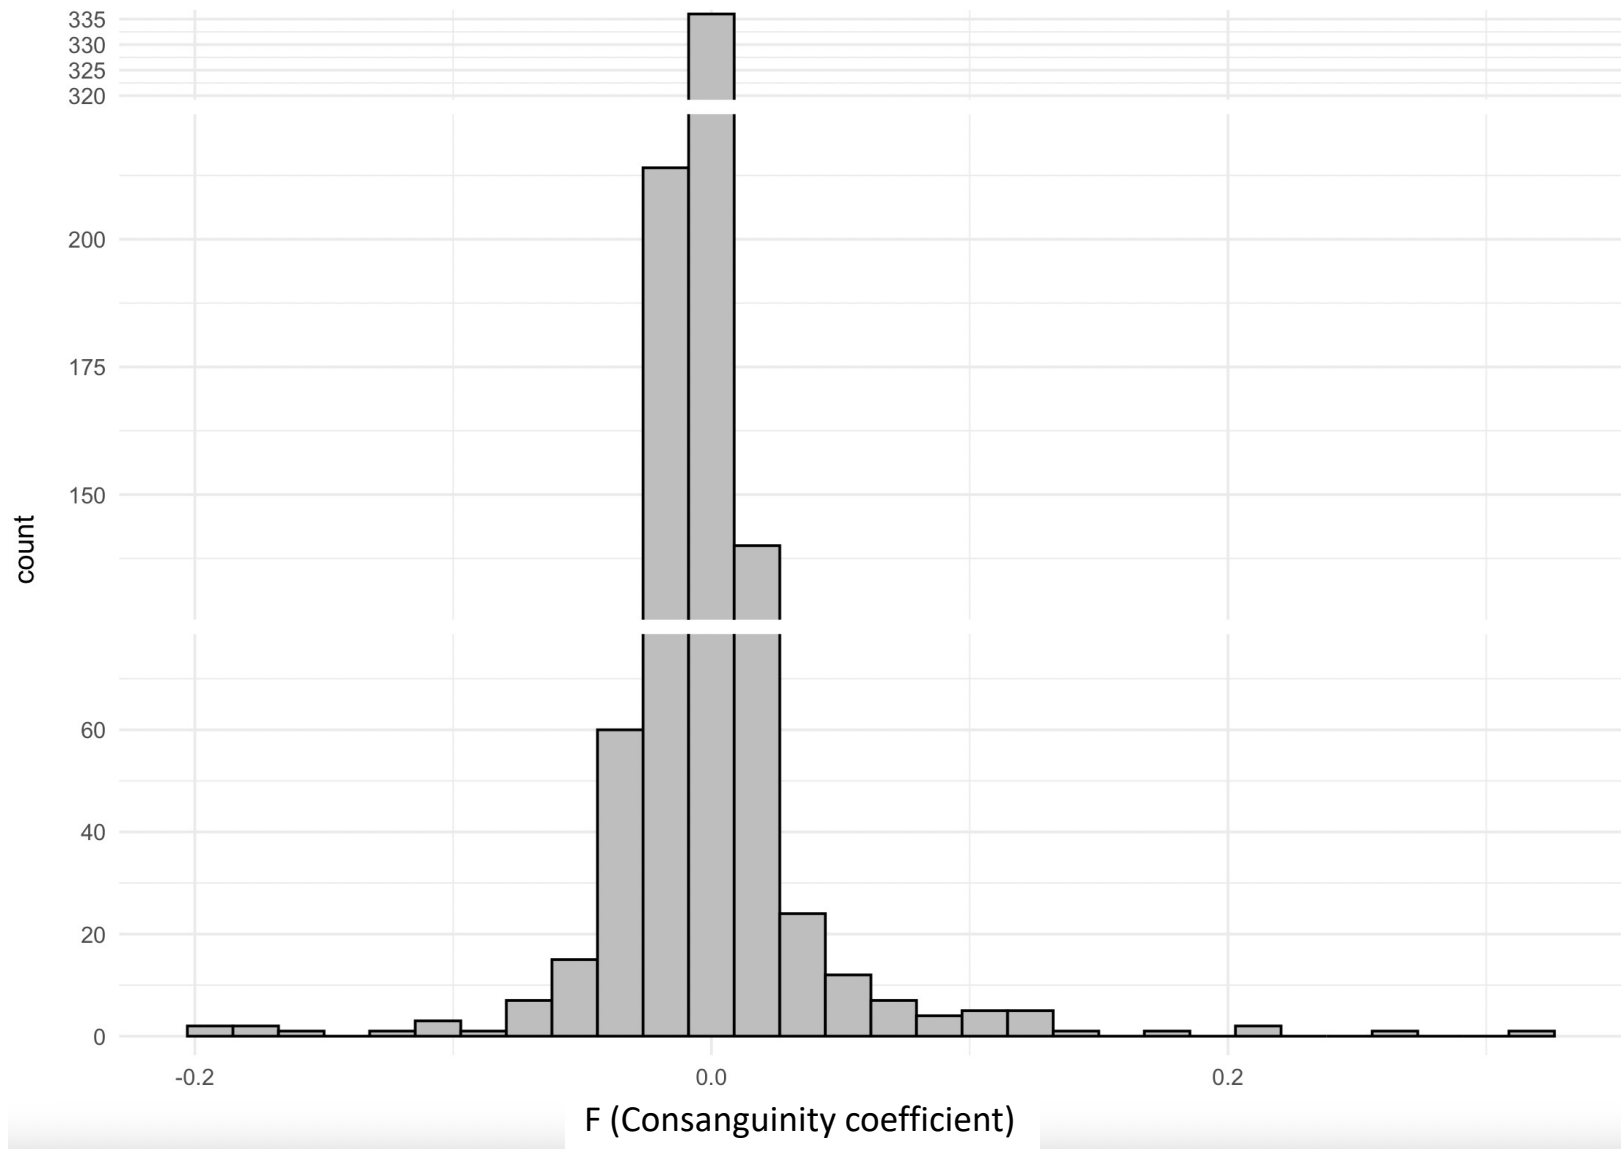

Supplementary Figure 4: Histogram of  $F_s$  in P<sup>3</sup>EGS pediatric and prenatal patients
